# Supplementary material
Source: publisher figshare collection journal article supplement (https://karger.figshare.com/ndownloader/files/6904136)
Supplement: Supplementary file 1 [file 6904136]

## Sheet: Blad2
								Relative Expression (cell line/osteoblasts)
	Illumina_ProbeID	Symbol	ID_REF	Osteoblast 240-OB	Osteoblast Kaat-OB	Cell line HOS	Cell line Saos-2	HOS/240	HOS/Kaat	Saos-2/240	Saos-2/Kaat
2515	460133	GID4	0n1Pee10l2Fd97nofU	296.065	264.058	262.632	228.768	0.887076	0.9946	0.772695	0.866355
42554	5810289	RICH2	ckrTl0P7DqLeqwq6q8	198.847	179.923	199.526	202.408	1.00341	1.10895	1.01791	1.12497
46324	3930035	TOP3A	r1SeCVHu5QKCCdUqec	209.208	180.967	273.295	268.905	1.30633	1.51019	1.28534	1.48594
4988	4480088	COPS3	NFN_lLhC72ipJIihQk	2072.5	1512.88	4516.62	2999.29	2.17931	2.98545	1.44718	1.98251
43708	3400360	SHMT1	QzQ957vV6XkqK1UQUY	172.544	165.674	230.587	226.131	1.3364	1.39181	1.31057	1.36491
40987	3890113	PMP22	BUGRWL_7_KUV4o2oSc	244.973	845.197	338.828	328.765	1.38312	0.400886	1.34205	0.388981
40988	5340630	PMP22	Nle6oq35fBNX5P6eQI	177.248	329.635	174.78	169.801	0.986077	0.530223	0.957983	0.515117
40986	1400671	PMP22	xyJ_nq3Ke97l1Ch7ek	5043.24	6766.18	3637.83	2837.76	0.721328	0.537649	0.562686	0.419404
42159	6180692	RASD1	ZtKFRqk837e49avnuE	854.524	3775.18	221.009	292.464	0.258634	0.0585426	0.342254	0.0774702
